# Supplementary material for: Characterization of reward and effort mechanisms in apathy
Source: PubMed Central journal article supplement (PMC4451957; doi:10.1016/j.jphysparis.2014.04.002), 2015
Supplement: mmc3.pdf [file mmc3.pdf]

Date 16-01-13

ID \_\_\_\_\_

AQ4-P-Self

Below are a number of statements. Each statement asks you to think about your life over the last 2 weeks.

For each statement, circle a number 1-5 to indicate how true the statement is of you over the last 2 weeks, i.e. how appropriately it describes your life right now.

Circle "1" if the statement does not describe you at all over the last 2 weeks, "5" if the statement describes you perfectly, and use the numbers in between accordingly. Circle "NA" if the statement is not applicable to you over the last 2 weeks.

1 = Completely UNTRUE: The statement is exactly the opposite of me over the last 2 weeks

2 = Mostly untrue of me over the last 2 weeks

3 = Neither untrue nor true of me over the last 2 weeks

4 = Quite true of me over the last 2 weeks

5 = Completely TRUE: The statement exactly describes me over the last 2 weeks

|            | In the last 2 weeks...                                                                             | UN-TRUE | 2 | 3 | 4 | 5 | TRUE |    |
|------------|----------------------------------------------------------------------------------------------------|---------|---|---|---|---|------|----|
| 1<br>E-ER  | I felt bad when I heard an acquaintance had had an accident or illness.                            | 1       | 2 | 3 | 4 | 5 |      | NA |
| 2<br>AI-EP | I didn't like to laze around.                                                                      | 1       | 2 | 3 | 4 | 5 |      | NA |
| 3<br>IC-N  | If a new restaurant opened locally, I'd want to try it out.                                        | 1       | 2 | 3 | 4 | 5 |      | NA |
| 4<br>SA    | If I realised I'd been unpleasant to someone, I felt terribly guilty afterwards.                   | 1       | 2 | 3 | 4 | 5 |      | NA |
| 5<br>AI-EP | I liked to have a busy schedule.                                                                   | 1       | 2 | 3 | 4 | 5 |      | NA |
| 6<br>IC-S  | I started conversations with random people.                                                        | 1       | 2 | 3 | 4 | 5 |      | NA |
| 7<br>AI-EP | I usually got up in the morning even if I didn't have to go to work.                               | 1       | 2 | 3 | 4 | 5 |      | NA |
| 8<br>IC-M  | When I didn't manage to do something, I tried to find other solutions.                             | 1       | 2 | 3 | 4 | 5 |      | NA |
| 9<br>IC-S  | I enjoyed spending time with my friends.                                                           | 1       | 2 | 3 | 4 | 5 |      | NA |
| 10<br>SA   | If I couldn't do something, I accepted help from others.                                           | 1       | 2 | 3 | 4 | 5 |      | NA |
| 11<br>AI-I | I got things done when they need to be done, without being reminded by others.                     | 1       | 2 | 3 | 4 | 5 |      | NA |
| 12<br>AI-I | I made decisions firmly and without hesitation.                                                    | 1       | 2 | 3 | 4 | 5 |      | NA |
| 13<br>IC-N | If someone had asked me "Would you like to visit every continent in the world?" I'd have said yes. | 1       | 2 | 3 | 4 | 5 |      | NA |
| 14<br>AI-I | When I had something I needed to do, I did it straightaway so it was out of the way.               | 1       | 2 | 3 | 4 | 5 |      | NA |

|             | In the last 2 weeks...                                                                                          | UN-TRUE | = | TRUE |   |   |    |
|-------------|-----------------------------------------------------------------------------------------------------------------|---------|---|------|---|---|----|
| 15<br>SA    | I changed my mind during an argument when I realised the other person might be right.                           | 1       | 2 | 3    | 4 | 5 | NA |
| 16<br>AI-I  | I liked being in charge.                                                                                        | 1       | 2 | 3    | 4 | 5 | NA |
| 17<br>IC-M  | If I had made a list of my attributes, my ability to push myself to achieve would have been one of them.        | 1       | 2 | 3    | 4 | 5 | NA |
| 18<br>E-ER  | I laughed out loud when listening to a comedy show.                                                             | 1       | 2 | 3    | 4 | 5 | NA |
| 19<br>IC-N  | I enjoyed visiting new places.                                                                                  | 1       | 2 | 3    | 4 | 5 | NA |
| 20<br>IC-M  | When I couldn't find something (e.g. a document), I went to a lot of trouble looking for it.                    | 1       | 2 | 3    | 4 | 5 | NA |
| 21<br>SA    | Based on the last 2 weeks, I'd say I care deeply how my loved ones think of me.                                 | 1       | 2 | 3    | 4 | 5 | NA |
| 22<br>AI-EP | If I didn't achieve my goals for the day, I got annoyed.                                                        | 1       | 2 | 3    | 4 | 5 | NA |
| 23<br>E-ER  | I felt sad or upset when I heard bad news.                                                                      | 1       | 2 | 3    | 4 | 5 | NA |
| 24<br>AI-I  | If I had to RSVP to an invitation, I did it promptly, without needing a reminder.                               | 1       | 2 | 3    | 4 | 5 | NA |
| 25<br>IC-S  | I suggested activities for me and my friends to do.                                                             | 1       | 2 | 3    | 4 | 5 | NA |
| 26<br>IC-I  | I enjoyed choosing what to do from a range of activities.                                                       | 1       | 2 | 3    | 4 | 5 | NA |
| 27<br>IC-N  | I enjoyed doing things with people I'd just met.                                                                | 1       | 2 | 3    | 4 | 5 | NA |
| 28<br>AI-I  | I was easily able to decide to do things by myself, without needing someone to push or encourage me.            | 1       | 2 | 3    | 4 | 5 | NA |
| 29<br>IC-S  | I started conversations without being prompted.                                                                 | 1       | 2 | 3    | 4 | 5 | NA |
| 30<br>E-ER  | When I listened to music, it could affect me deeply.                                                            | 1       | 2 | 3    | 4 | 5 | NA |
| 31<br>IC-N  | I enjoyed trying out products, tools or recipes that I was unfamiliar with.                                     | 1       | 2 | 3    | 4 | 5 | NA |
| 32<br>SA    | After having taken a decision, I wondered if I'd made the wrong choice.                                         | 1       | 2 | 3    | 4 | 5 | NA |
| 33<br>IC-M  | When I decided to do something, I was motivated to see it through to the end.                                   | 1       | 2 | 3    | 4 | 5 | NA |
| 34<br>IC-S  | If I hadn't seen a close friend for a while, I got in touch by phone/internet.                                  | 1       | 2 | 3    | 4 | 5 | NA |
| 35<br>SA    | When I finished doing something, I took stock of the situation to identify what was going well and what wasn't. | 1       | 2 | 3    | 4 | 5 | NA |
| 36<br>IC-N  | I enjoyed learning new things at work.                                                                          | 1       | 2 | 3    | 4 | 5 | NA |
| 37<br>IC-S  | I was pleased when I received unexpected invitations from friends.                                              | 1       | 2 | 3    | 4 | 5 | NA |
| 38<br>IC-I  | I would say I've been quite interested in life.                                                                 | 1       | 2 | 3    | 4 | 5 | NA |

|             | In the last 2 weeks...                                                                                       | UN-TRUE | 1 | 2 | 3 | 4 | 5 | TRUE |    |
|-------------|--------------------------------------------------------------------------------------------------------------|---------|---|---|---|---|---|------|----|
| 39<br>IC-M  | When I decided to do something, I was easily able to make an effort.                                         | 1       | 2 | 3 | 4 | 5 |   |      | NA |
| 40<br>SA    | I felt awful if I said something insensitive.                                                                | 1       | 2 | 3 | 4 | 5 |   |      | NA |
| 41<br>IC-I  | I've been feeling there is so much to do in life and I want to try everything.                               | 1       | 2 | 3 | 4 | 5 |   |      | NA |
| 42<br>E-ER  | When someone told me a joke I laughed easily.                                                                | 1       | 2 | 3 | 4 | 5 |   |      | NA |
| 43<br>AI-EP | Getting something done by 9am gave me a sense of satisfaction.                                               | 1       | 2 | 3 | 4 | 5 |   |      | NA |
| 44<br>SA    | If, during a discussion, I realised I was in the wrong, I admitted it – at least to myself.                  | 1       | 2 | 3 | 4 | 5 |   |      | NA |
| 45<br>IC-S  | I've been going out with friends on a weekly basis.                                                          | 1       | 2 | 3 | 4 | 5 |   |      | NA |
| 46<br>IC-M  | I found it annoying when I was in the middle of doing a task at work and I had to stop to do something else. | 1       | 2 | 3 | 4 | 5 |   |      | NA |
| 47<br>IC-I  | I wished I had more spare time for hobbies and leisure activities.                                           | 1       | 2 | 3 | 4 | 5 |   |      | NA |
| 48<br>IC-M  | If I thought of something I needed to do, I wrote it down so I wouldn't forget.                              | 1       | 2 | 3 | 4 | 5 |   |      | NA |
| 49<br>IC-M  | I tried out new ways of doing things at work or home.                                                        | 1       | 2 | 3 | 4 | 5 |   |      | NA |
| 50<br>E-ER  | I felt anxious when I was waiting to hear important news (e.g. exam result or job interview).                | 1       | 2 | 3 | 4 | 5 |   |      | NA |
| 51<br>E-ER  | I was easily 'moved' by films/TV programs.                                                                   | 1       | 2 | 3 | 4 | 5 |   |      | NA |
